# Supplementary material for: Palladium(ii) and copper(ii) chloride complexes bearing bulky α-diimine ligands as catalysts for norbornene vinyl-addition (co)polymerization
Source: Royal Society of Chemistry journal article supplement (doi:10.1039/c5ra23970b), 2016-01-01
Supplement: c5ra23970b1.pdf [file c5ra23970b1.pdf]

### Electronic Supplementary Material (ESI)

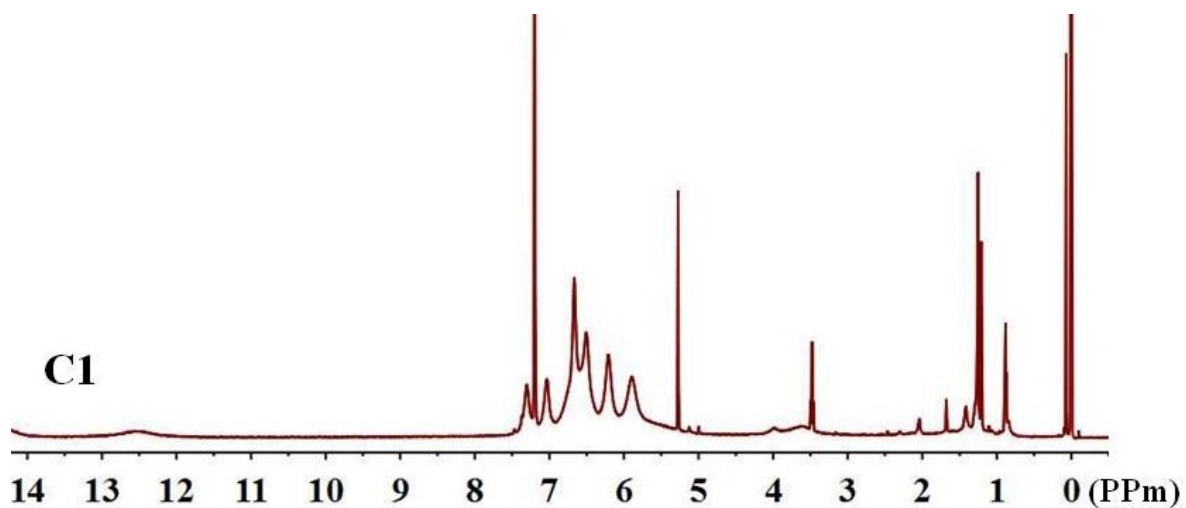

**Fig.S1.**  $^1\text{H}$  NMR spectrum of C1

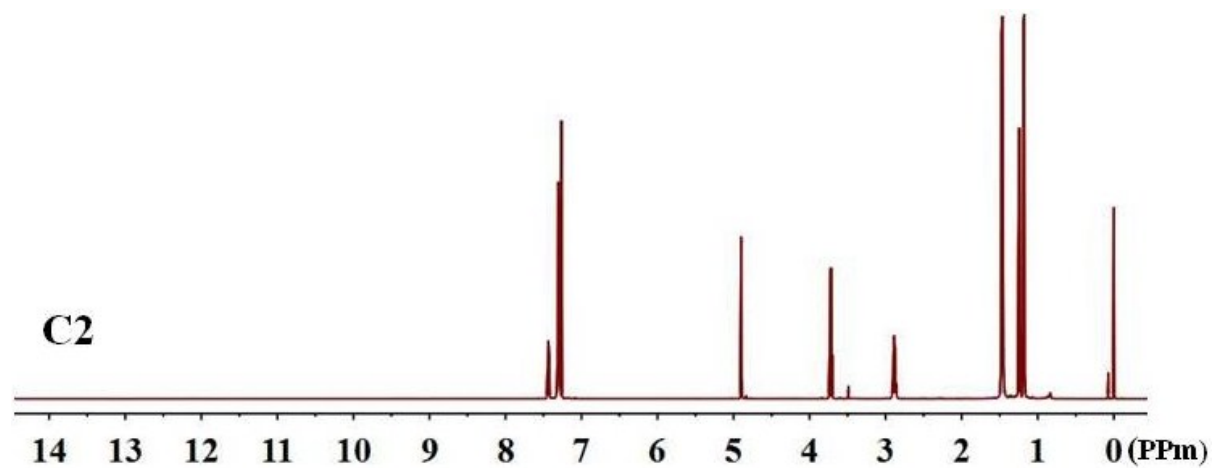

**Fig.S2.**  $^1\text{H}$  NMR spectrum of C2

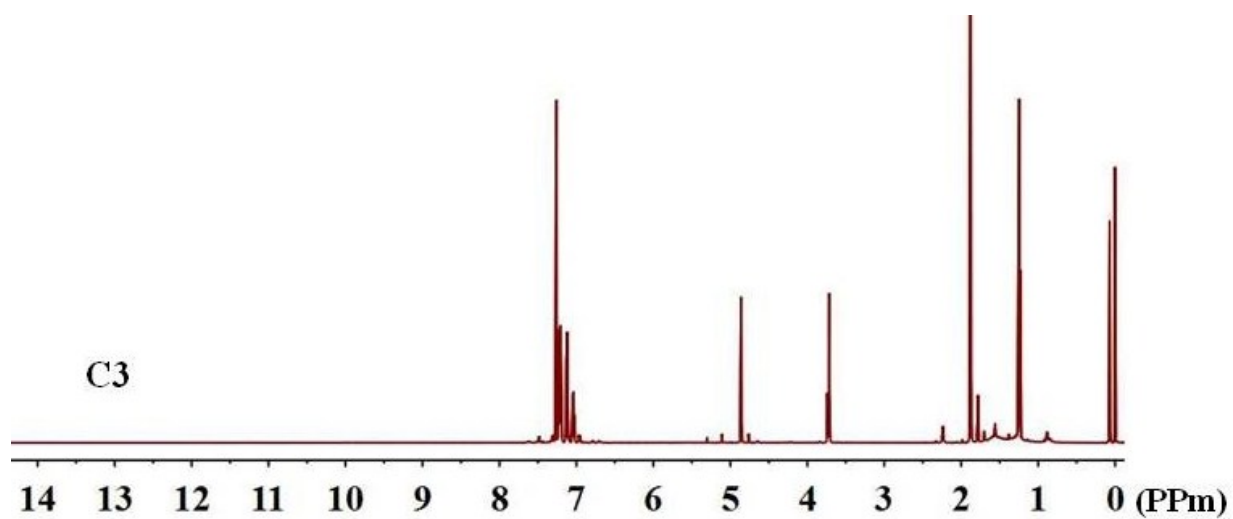

Fig.S3. <sup>1</sup>H NMR spectrum of C3

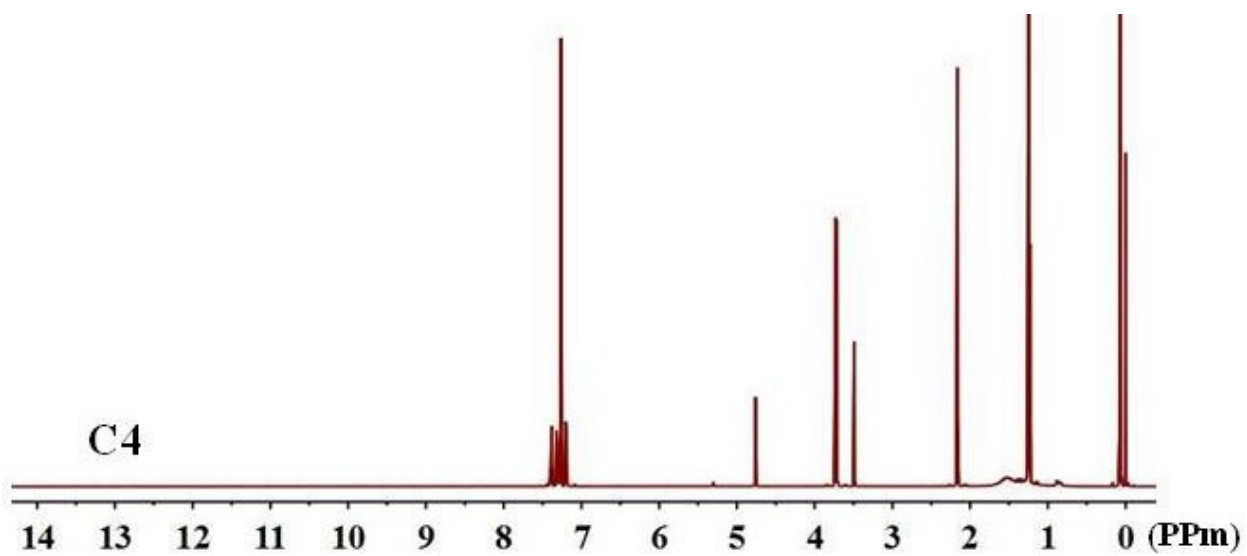

Fig.S4. <sup>1</sup>H NMR spectrum of C4

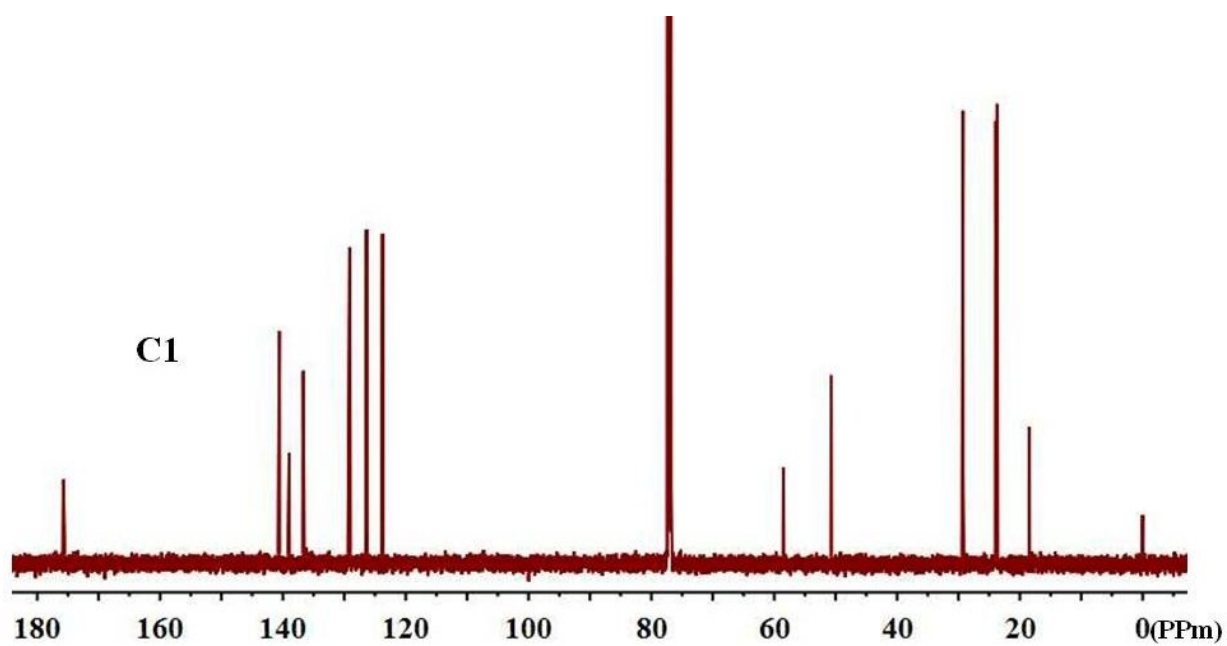

Fig.S5.  $^{13}\text{C}$  NMR spectrum of C1

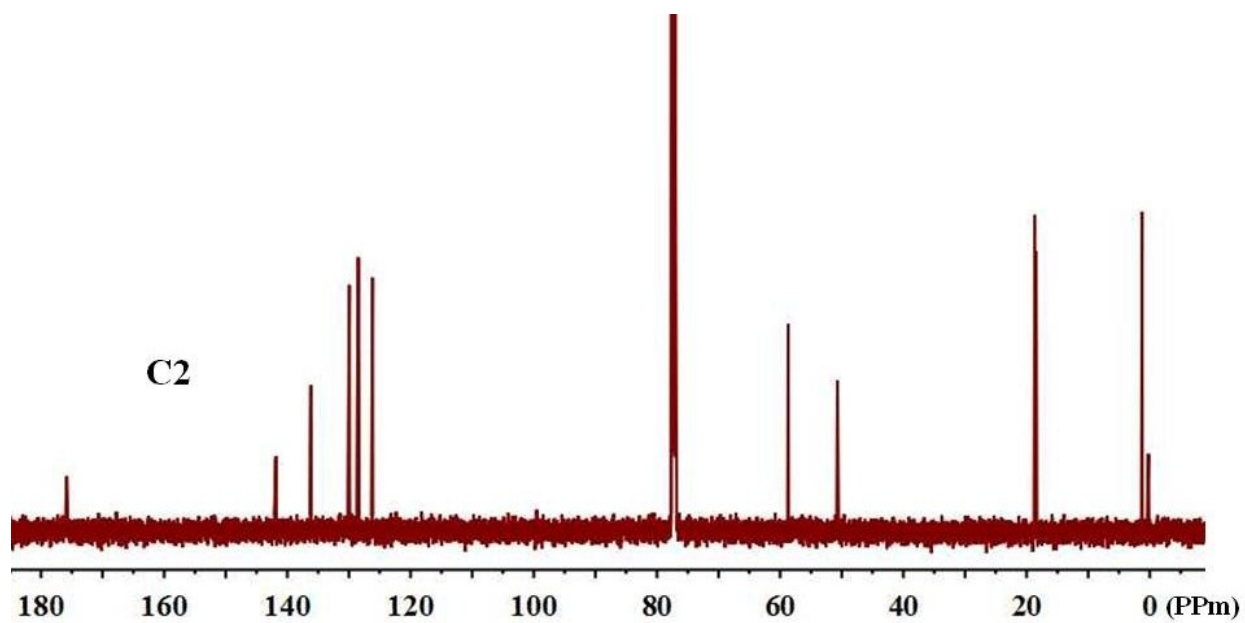

Fig.S6.  $^{13}\text{C}$  NMR spectrum of C2

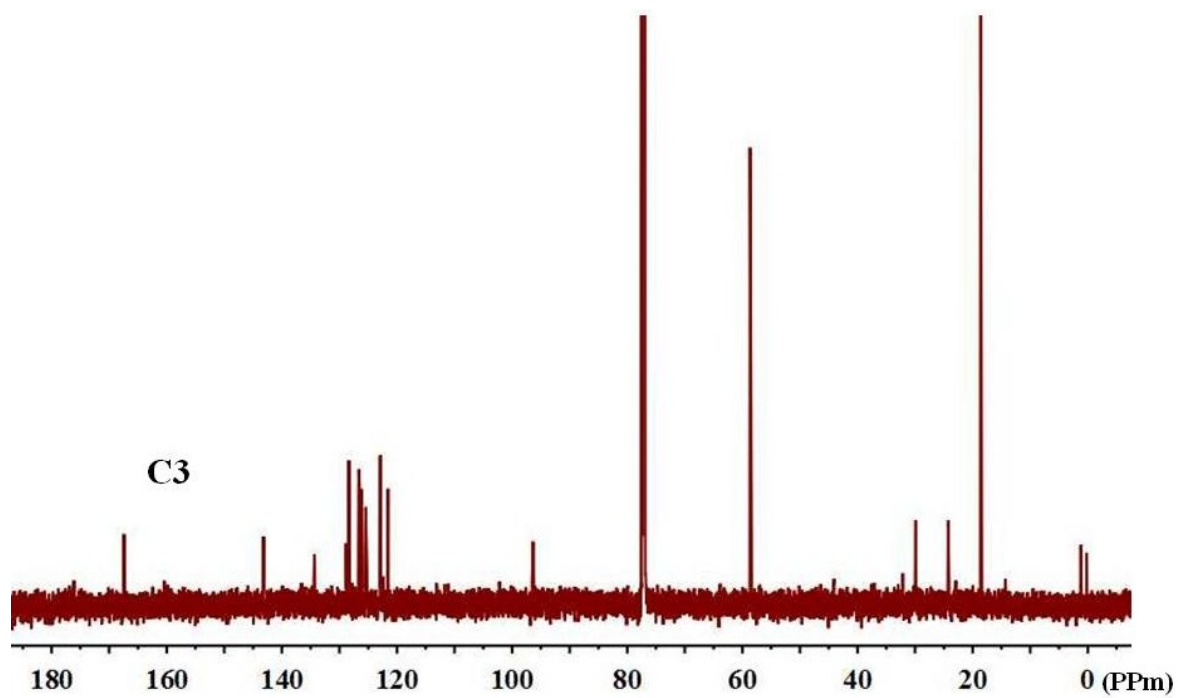

**Fig.S7.**  $^{13}\text{C}$  NMR spectrum of C3

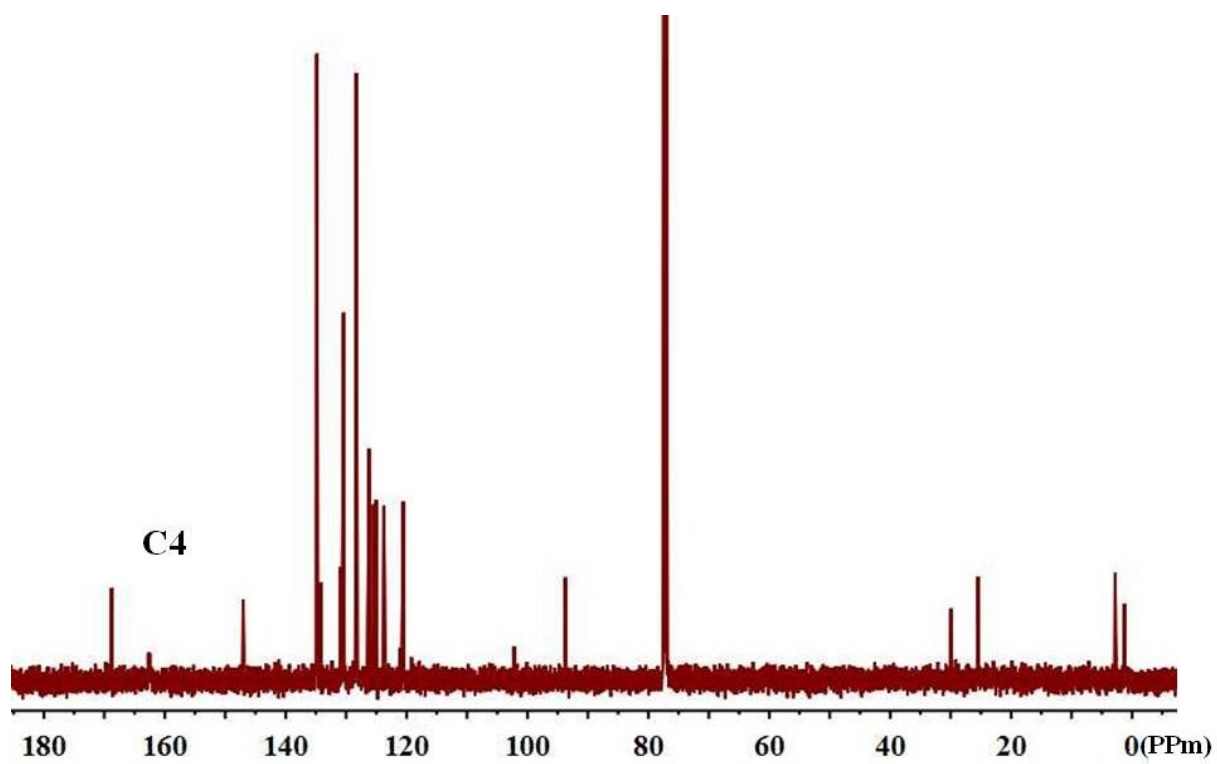

**Fig.S8.**  $^{13}\text{C}$  NMR spectrum of C4

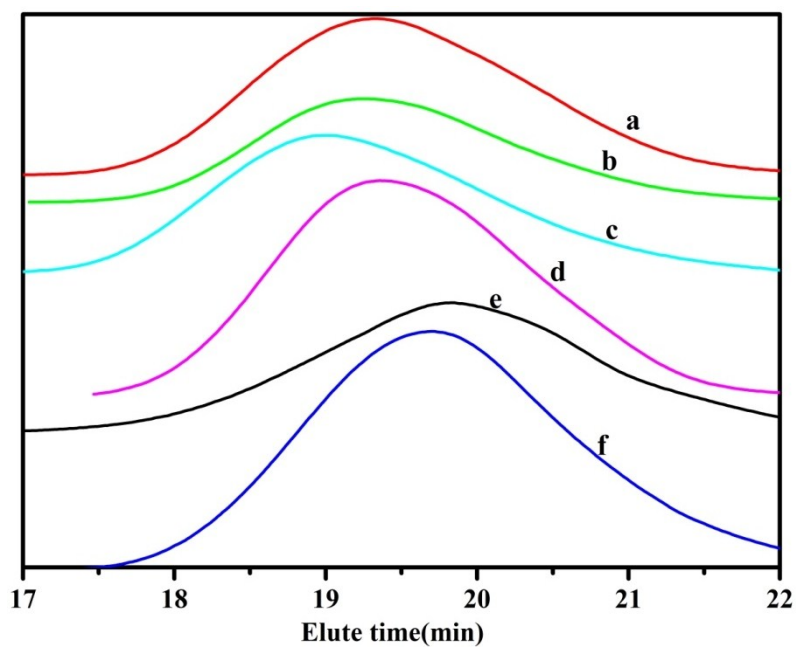

**Fig.S9.** GPC curves of the poly (NB-co-BN) with different BN molar ratios(%): (a) 62.1, (b) 43.6, (c) 37.5, ( d) 22.4, (e) 100, and (f) 9.8 of BN molar ratio (%) obtained by **C2/MAO** system.
